# Supplementary material for: Δ8(14)-Ergostenol Glycoside Derivatives Inhibit the Expression of Inflammatory Mediators and Matrix Metalloproteinase
Source: MDPI journal article supplement (doi:10.3390/molecules26154547), 2021-07-28
Supplement: s1 [file s1]

## Supporting Information

1. The cartesian coordinates for DHE (2) and Ergn (3) as below.

### DHE (2)

| Row | Symbol | X         | Y          | Z          |
|-----|--------|-----------|------------|------------|
| 1   | C      | 4.1755510 | 2.0528860  | 0.4500790  |
| 2   | C      | 4.7748450 | 0.8872690  | -0.3442210 |
| 3   | C      | 4.1188370 | -0.4663250 | 0.0633320  |
| 4   | C      | 2.5995310 | -0.3836400 | -0.3091720 |
| 5   | C      | 1.9581070 | 0.9568650  | 0.0548630  |
| 6   | C      | 2.6727330 | 2.0259880  | 0.4186510  |
| 7   | H      | 4.5027460 | 1.0496920  | -1.3975550 |
| 8   | H      | 4.5483460 | 2.0441360  | 1.4839540  |
| 9   | H      | 4.5275640 | 3.0006460  | 0.0247290  |
| 10  | H      | 2.5482430 | -0.4473030 | -1.4083630 |
| 11  | H      | 2.1603370 | 2.9551800  | 0.6510830  |
| 12  | C      | 4.7888720 | -1.5971300 | -0.7598400 |
| 13  | C      | 6.3092030 | 0.8726530  | -0.2678580 |
| 14  | C      | 6.9180030 | -0.2642770 | -1.0787320 |
| 15  | C      | 6.3213090 | -1.6087740 | -0.6594130 |
| 16  | H      | 4.3967220 | -2.5699930 | -0.4490460 |
| 17  | H      | 6.7257470 | -2.4085060 | -1.2925050 |
| 18  | H      | 4.5070640 | -1.4732580 | -1.8137600 |
| 19  | H      | 6.6474770 | -1.8239030 | 0.3635000  |
| 20  | H      | 6.6503190 | 0.7721580  | 0.7683740  |
| 21  | H      | 6.7078220 | 1.8249740  | -0.6322830 |
| 22  | H      | 6.6926500 | -0.0962920 | -2.1449160 |
| 23  | C      | 1.7663500 | -1.5774060 | 0.2262300  |
| 24  | H      | 2.1313720 | -2.5022330 | -0.2302220 |

|    |   |            |            |            |
|----|---|------------|------------|------------|
| 25 | H | 1.9286540  | -1.6859770 | 1.3006420  |
| 26 | C | 0.4688130  | 0.9974870  | -0.1756940 |
| 27 | H | 0.3410120  | 0.8047920  | -1.2541540 |
| 28 | C | 0.2513770  | -1.4676630 | -0.0279610 |
| 29 | H | 0.0524530  | -1.5178160 | -1.1061470 |
| 30 | H | -0.2375400 | -2.3369230 | 0.4181760  |
| 31 | C | -0.3278330 | -0.1486520 | 0.5159820  |
| 32 | C | -1.7782630 | 0.2139650  | 0.0554490  |
| 33 | H | -1.8518160 | -0.0759050 | -1.0011940 |
| 34 | C | -0.3337320 | 2.2645050  | 0.1321420  |
| 35 | H | -0.0603980 | 2.6687050  | 1.1105900  |
| 36 | H | -0.1537640 | 3.0550200  | -0.6000620 |
| 37 | C | -1.8066690 | 1.7766710  | 0.1302810  |
| 38 | H | -2.3667260 | 2.1932090  | -0.7091260 |
| 39 | H | -2.3203040 | 2.1071120  | 1.0380150  |
| 40 | C | 4.3085580  | -0.7325200 | 1.5739110  |
| 41 | H | 4.0599670  | -1.7656620 | 1.8265800  |
| 42 | H | 5.3408770  | -0.5683300 | 1.8871980  |
| 43 | H | 3.6748110  | -0.0809620 | 2.1793540  |
| 44 | C | -0.2011250 | -0.0763350 | 2.0512100  |
| 45 | H | -0.6966330 | 0.8073570  | 2.4597310  |
| 46 | H | -0.6542270 | -0.9520530 | 2.5239810  |
| 47 | H | 0.8421880  | -0.0305660 | 2.3675990  |
| 48 | C | -2.9936430 | -0.4390800 | 0.7753220  |
| 49 | H | -2.9474490 | -0.1245120 | 1.8278680  |
| 50 | C | -2.9744690 | -1.9725160 | 0.7499250  |
| 51 | H | -2.8933400 | -2.3595430 | -0.2702840 |
| 52 | H | -2.1366820 | -2.3698620 | 1.3231220  |
| 53 | H | -3.8904010 | -2.3757230 | 1.1894810  |
| 54 | C | -6.5087650 | 0.0632640  | -1.0268230 |
| 55 | H | -6.4792250 | -0.1597110 | -2.1043330 |
| 56 | C | -7.7479810 | -0.7165960 | -0.4836920 |

|    |   |            |            |            |
|----|---|------------|------------|------------|
| 57 | H | -7.5065720 | -1.7808500 | -0.6060750 |
| 58 | C | -8.0064370 | -0.4760310 | 1.0101440  |
| 59 | H | -7.1088780 | -0.6572550 | 1.6064370  |
| 60 | H | -8.3348520 | 0.5502560  | 1.2003760  |
| 61 | H | -8.7937650 | -1.1421360 | 1.3749610  |
| 62 | C | -9.0133510 | -0.4471610 | -1.3107460 |
| 63 | H | -8.8402380 | -0.6273370 | -2.3762300 |
| 64 | H | -9.8297990 | -1.1011690 | -0.9907790 |
| 65 | H | -9.3607620 | 0.5839720  | -1.1969120 |
| 66 | C | -6.6284640 | 1.5857550  | -0.8877730 |
| 67 | H | -5.7813570 | 2.0845850  | -1.3653090 |
| 68 | H | -7.5375090 | 1.9542670  | -1.3677730 |
| 69 | H | -6.6517660 | 1.9023890  | 0.1581360  |
| 70 | O | 8.3323100  | -0.2168030 | -0.8751550 |
| 71 | H | 8.7286920  | -0.9303050 | -1.3851070 |
| 72 | C | -4.2807840 | 0.1409700  | 0.2171390  |
| 73 | H | -4.4050510 | 1.2070010  | 0.3839070  |
| 74 | C | -5.2329810 | -0.5118400 | -0.4499800 |
| 75 | H | -5.1200450 | -1.5809410 | -0.6209500 |

### ERGN (3)

| Row | Symbol | X          | Y          | Z          |
|-----|--------|------------|------------|------------|
| 1   | C      | -4.1605480 | -2.1836850 | 0.0474430  |
| 2   | C      | -4.9111340 | -0.9209450 | -0.3852290 |
| 3   | C      | -4.1616360 | 0.3764870  | 0.0513120  |
| 4   | C      | -2.7389700 | 0.3483390  | -0.6183520 |
| 5   | C      | -1.9700430 | -0.9194730 | -0.2673190 |

|    |   |            |            |            |
|----|---|------------|------------|------------|
| 6  | H | -4.9061810 | -0.9111350 | -1.4866390 |
| 7  | H | -4.1311450 | -2.2469750 | 1.1406420  |
| 8  | H | -4.7036600 | -3.0703370 | -0.2978770 |
| 9  | H | -2.9381670 | 0.2829920  | -1.7012320 |
| 10 | C | -4.9668920 | 1.5875650  | -0.4818530 |
| 11 | C | -6.3863150 | -0.9395950 | 0.0455490  |
| 12 | C | -7.1432750 | 0.2801250  | -0.4665470 |
| 13 | C | -6.4419930 | 1.5747950  | -0.0513380 |
| 14 | H | -4.5026180 | 2.5216140  | -0.1535800 |
| 15 | H | -6.9621370 | 2.4349840  | -0.4913810 |
| 16 | H | -4.9158080 | 1.5853330  | -1.5790620 |
| 17 | H | -6.5314600 | 1.6774170  | 1.0352080  |
| 18 | H | -6.4820110 | -0.9709250 | 1.1360460  |
| 19 | H | -6.8720780 | -1.8446000 | -0.3330490 |
| 20 | H | -7.1741620 | 0.2346350  | -1.5677600 |
| 21 | C | -1.9182020 | 1.6309640  | -0.3866380 |
| 22 | H | -2.2922630 | 2.4258830  | -1.0380720 |
| 23 | H | -2.0568850 | 1.9901750  | 0.6361610  |
| 24 | C | -0.4195420 | 1.4378030  | -0.6429580 |
| 25 | H | -0.2625880 | 1.1526790  | -1.6903370 |
| 26 | H | 0.0893870  | 2.3930040  | -0.4975950 |
| 27 | C | 0.1796780  | 0.3397920  | 0.2578120  |
| 28 | C | 1.5845470  | -0.1959880 | -0.2113690 |
| 29 | H | 1.5253070  | -0.2804900 | -1.3066140 |
| 30 | C | 0.1735050  | -2.1486360 | 0.3401270  |
| 31 | H | -0.0853270 | -2.6820930 | 1.2612220  |
| 32 | H | 0.0357030  | -2.8630250 | -0.4768820 |
| 33 | C | 1.6253890  | -1.6309420 | 0.3720490  |
| 34 | H | 2.2920670  | -2.2880450 | -0.1875450 |
| 35 | H | 2.0064440  | -1.5989850 | 1.3983160  |
| 36 | C | -4.0303690 | 0.4660120  | 1.5882980  |
| 37 | H | -3.7365640 | 1.4718850  | 1.8983040  |

|    |   |            |            |            |
|----|---|------------|------------|------------|
| 38 | H | -4.9702600 | 0.2412870  | 2.0945320  |
| 39 | H | -3.2770270 | -0.2271380 | 1.9674520  |
| 40 | C | 0.2314410  | 0.7958900  | 1.7362150  |
| 41 | H | 0.6412440  | 0.0156710  | 2.3824650  |
| 42 | H | 0.8512790  | 1.6886930  | 1.8594170  |
| 43 | H | -0.7674070 | 1.0266200  | 2.1097880  |
| 44 | C | 2.8588720  | 0.6244210  | 0.1214640  |
| 45 | H | 2.9619650  | 0.6441660  | 1.2147850  |
| 46 | C | 2.7968160  | 2.0775730  | -0.3762640 |
| 47 | H | 2.5741510  | 2.1151220  | -1.4477490 |
| 48 | H | 2.0354700  | 2.6596870  | 0.1429870  |
| 49 | H | 3.7482890  | 2.5901620  | -0.2193960 |
| 50 | C | 6.7047650  | -0.2404660 | -0.4807660 |
| 51 | H | 6.5881200  | -0.2177870 | -1.5737050 |
| 52 | C | 7.9960870  | 0.5725930  | -0.1794490 |
| 53 | H | 7.7738130  | 1.6057840  | -0.4784360 |
| 54 | C | 8.3812240  | 0.6024690  | 1.3081100  |
| 55 | H | 7.5690950  | 0.9775560  | 1.9356830  |
| 56 | H | 8.6543680  | -0.3926900 | 1.6714730  |
| 57 | H | 9.2453110  | 1.2546960  | 1.4650350  |
| 58 | C | 9.1867920  | 0.1099110  | -1.0330580 |
| 59 | H | 8.9295870  | 0.0866110  | -2.0964630 |
| 60 | H | 10.0367300 | 0.7877800  | -0.9106860 |
| 61 | H | 9.5272740  | -0.8903030 | -0.7491560 |
| 62 | C | 6.8055160  | -1.7164480 | -0.0613470 |
| 63 | H | 5.9473290  | -2.2891850 | -0.4196790 |
| 64 | H | 7.6998920  | -2.1937460 | -0.4689850 |
| 65 | H | 6.8369060  | -1.8210860 | 1.0274010  |
| 66 | O | -8.4733140 | 0.2006330  | 0.0523180  |
| 67 | H | -8.9620910 | 0.9651000  | -0.2685510 |
| 68 | C | 4.1202490  | -0.0769270 | -0.4429090 |
| 69 | H | 4.1185440  | 0.0263420  | -1.5369820 |

|    |   |            |            |            |
|----|---|------------|------------|------------|
| 70 | H | 4.0567260  | -1.1465950 | -0.2383510 |
| 71 | C | 5.4542030  | 0.4431430  | 0.1148580  |
| 72 | H | 5.4520670  | 0.3181140  | 1.2050440  |
| 73 | H | 5.5378100  | 1.5192700  | -0.0692310 |
| 74 | C | -0.6889680 | -0.9146420 | 0.1255600  |
| 75 | C | -2.7320330 | -2.2044560 | -0.5199310 |
| 76 | H | -2.8039000 | -2.3513020 | -1.6088050 |
| 77 | H | -2.1896090 | -3.0659580 | -0.1275390 |

## 2. $^1\text{H}$ NMR and $^{13}\text{C}$ NMR spectra

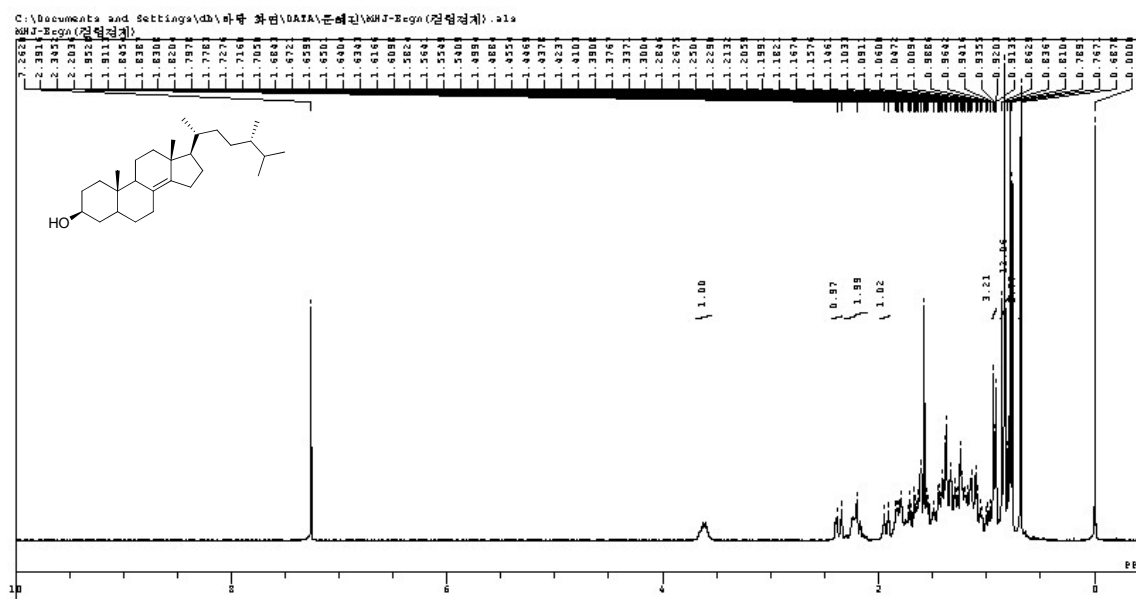

Figure S1.  $^1\text{H}$  NMR spectrum of compound 3

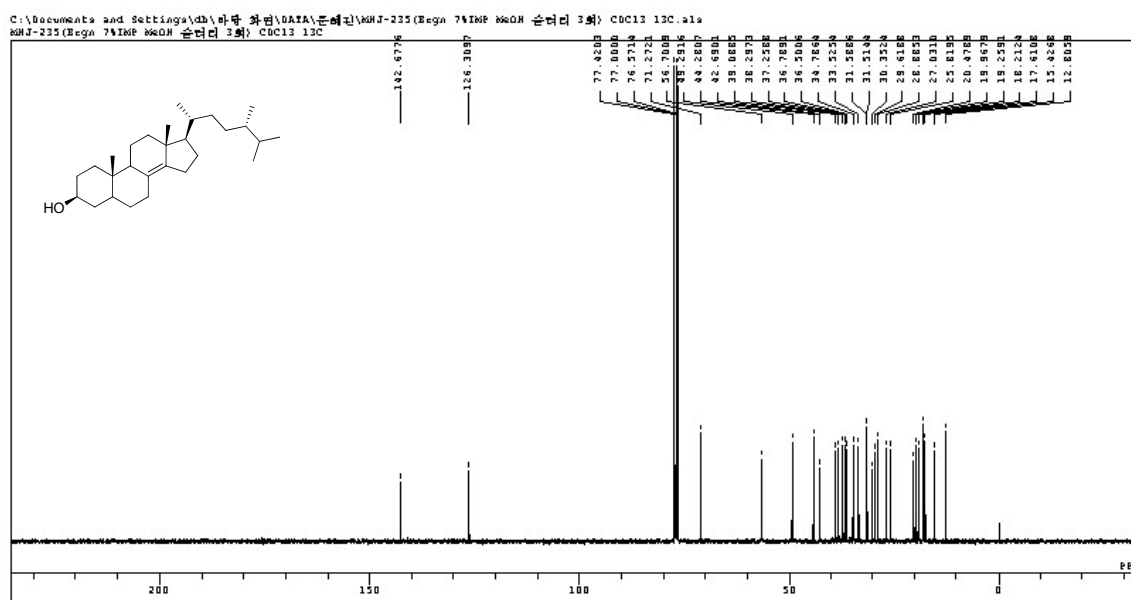

Figure S2.  $^{13}\text{C}$  NMR spectrum of compound 3

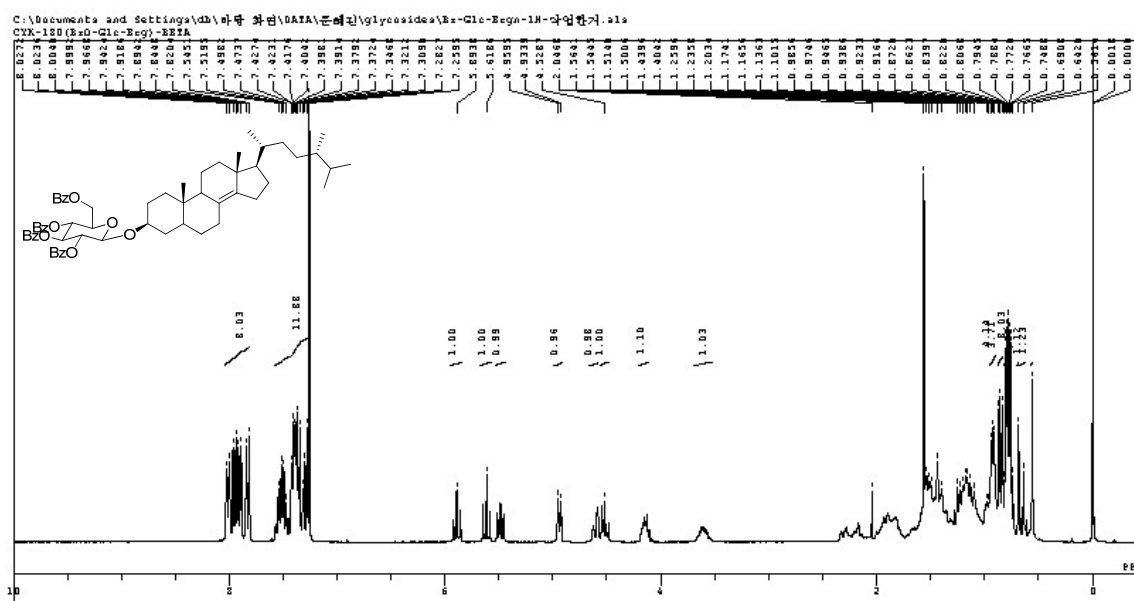

Figure S3.  $^1\text{H}$  NMR spectrum of compound 5a

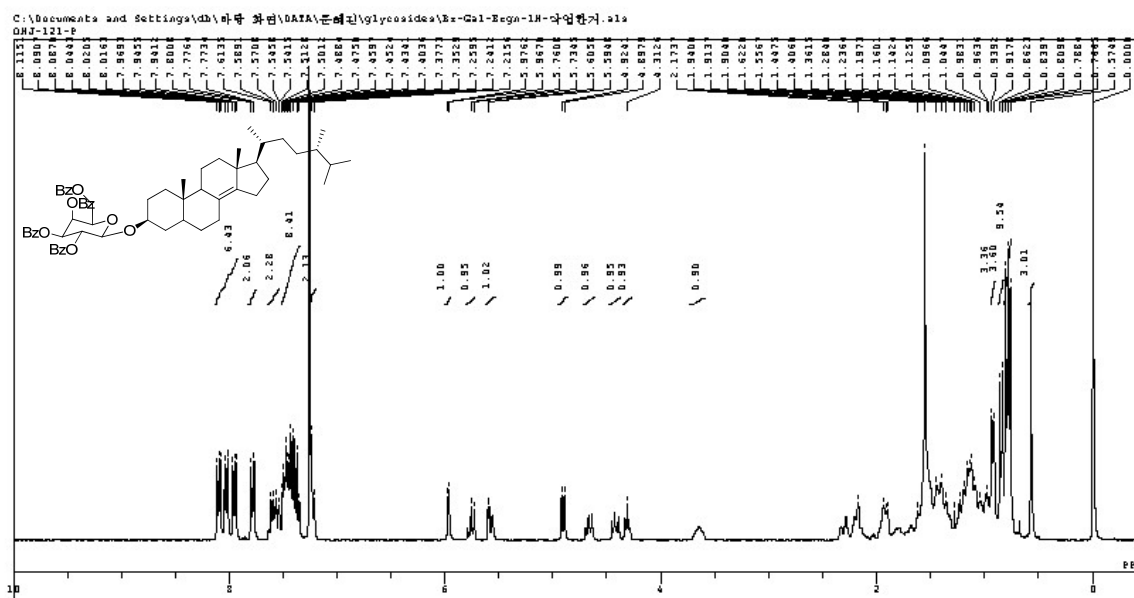

Figure S4.  $^1\text{H}$  NMR spectrum of compound 5b



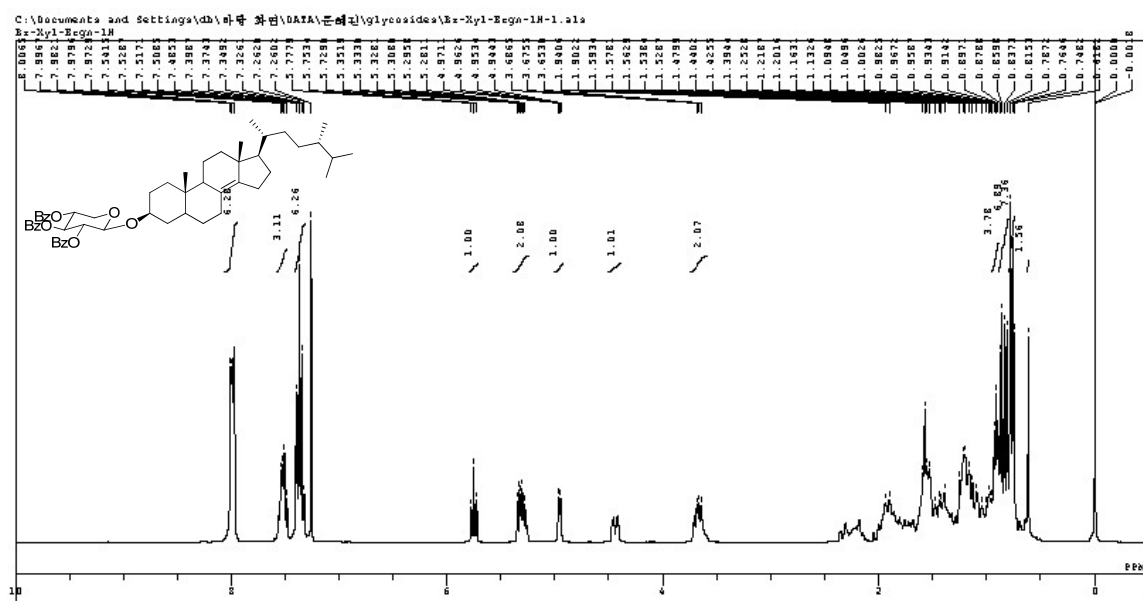

Figure S5.  $^1\text{H}$  NMR spectrum of compound 5c

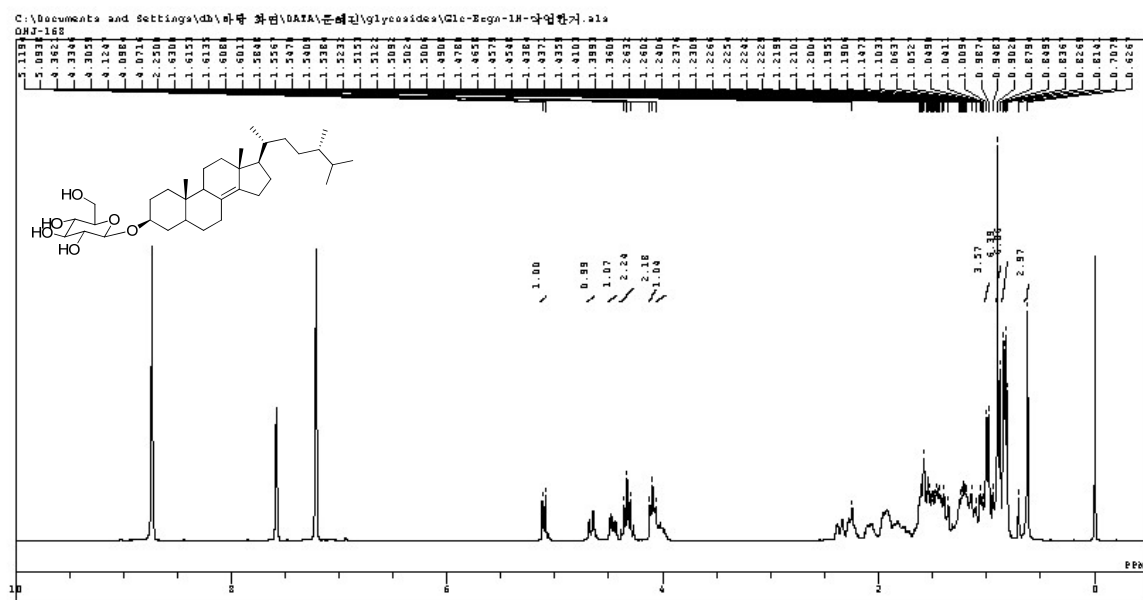

Figure S6.  $^1\text{H}$  NMR spectrum of compound 3a

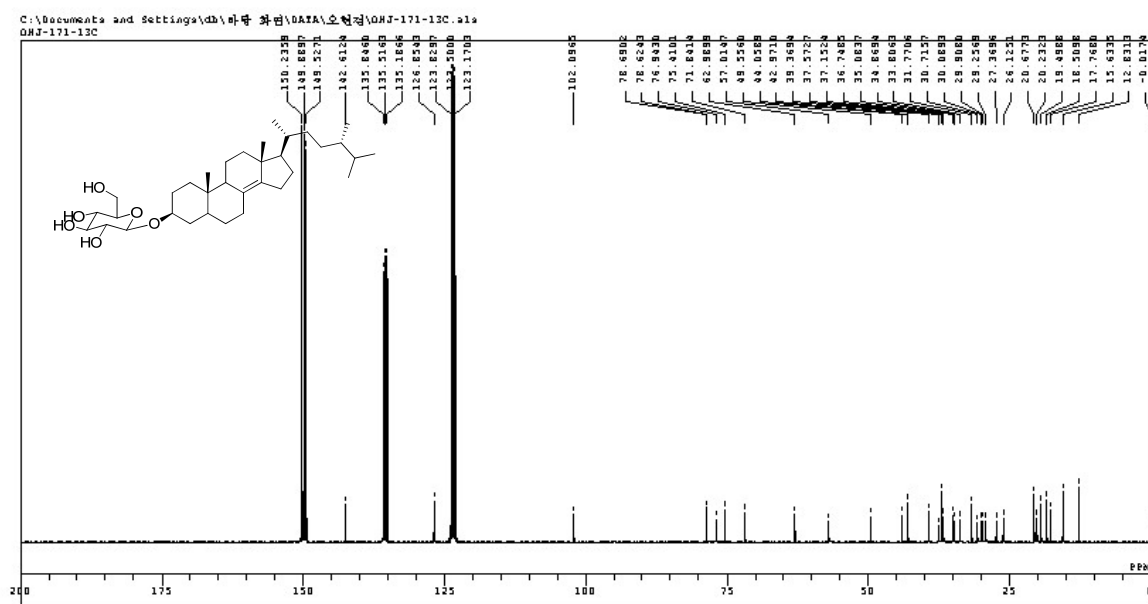

Figure S7.  $^{13}\text{C}$  NMR spectrum of compound 3a

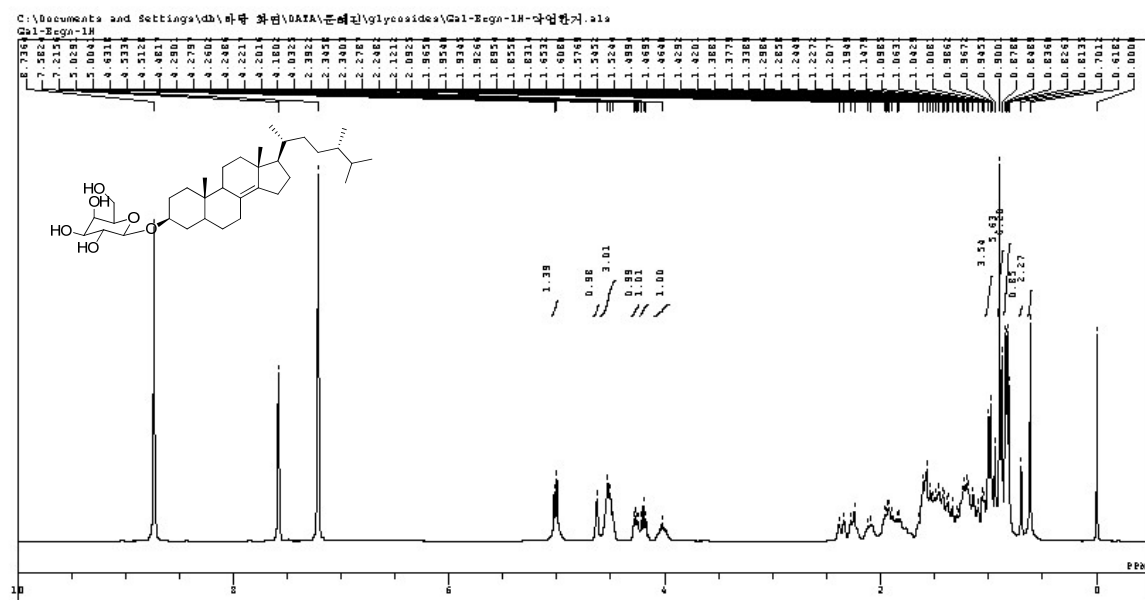

Figure S8.  $^1\text{H}$  NMR spectrum of compound 3b

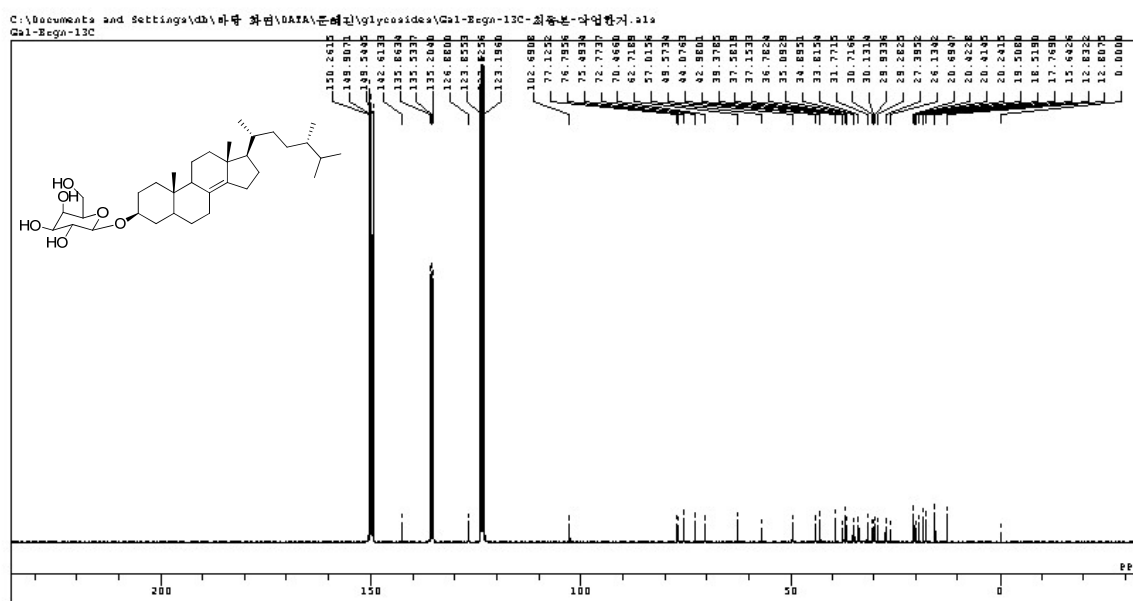

**Figure S9.**  $^{13}\text{C}$  NMR spectrum of compound **3b**

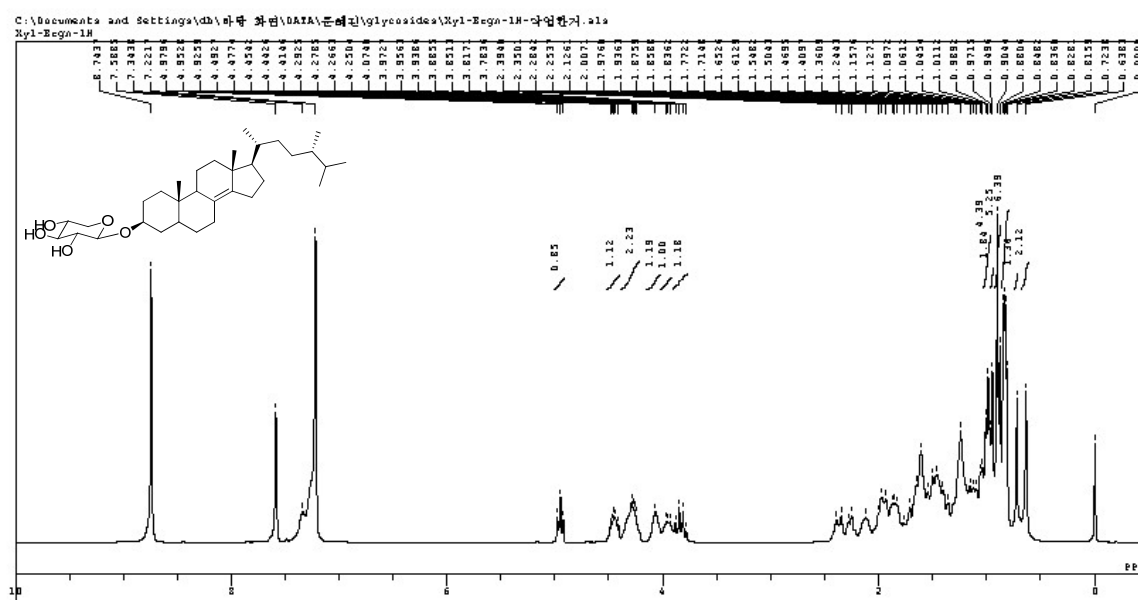

**Figure S10.**  $^1\text{H}$  NMR spectrum of compound **3c**

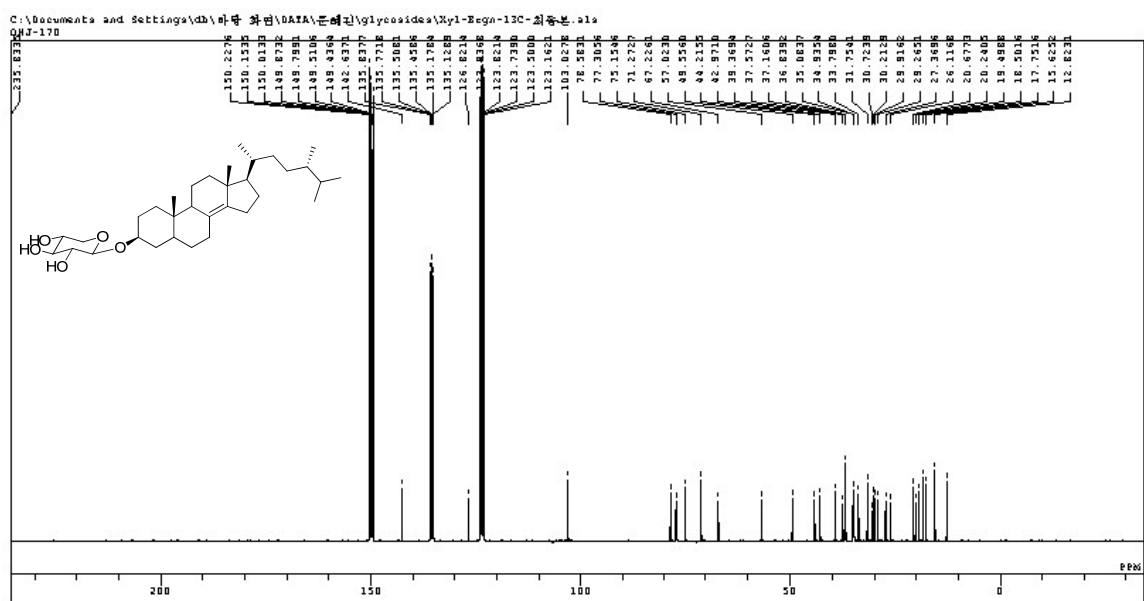

**Figure S11.** <sup>13</sup>C NMR spectrum of compound **3c**
